# Supplementary material for: Vertical spreading of two-dimensional crystalline colloidal arrays
Source: Royal Society of Chemistry journal article supplement (doi:10.1039/c2tc00794k), 2012-12-13
Supplement: c2tc00794k.pdf [file c2tc00794k.pdf]

## Supporting Information

### Vertical Spreading of Two-Dimensional Crystalline Colloidal Arrays

Jian-Tao Zhang, Luling Wang, Xing Chao, Sachin Velankar and Sanford A. Asher\*

Department of Chemistry, University of Pittsburgh, Pittsburgh, PA 15260

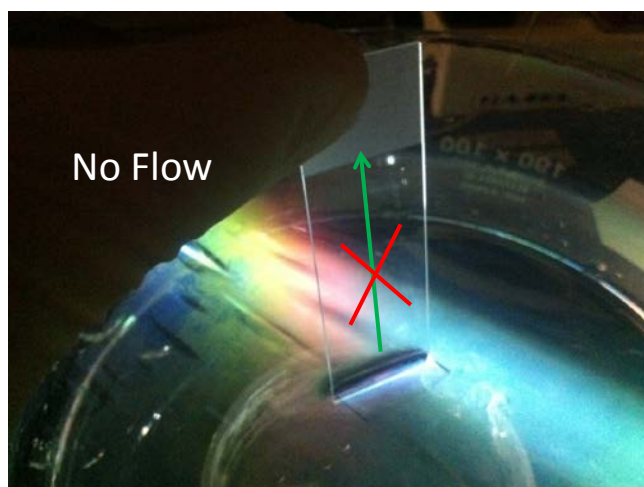

Figure S1. Photograph of a dry glass slide contacting the 2-D array on a water surface.

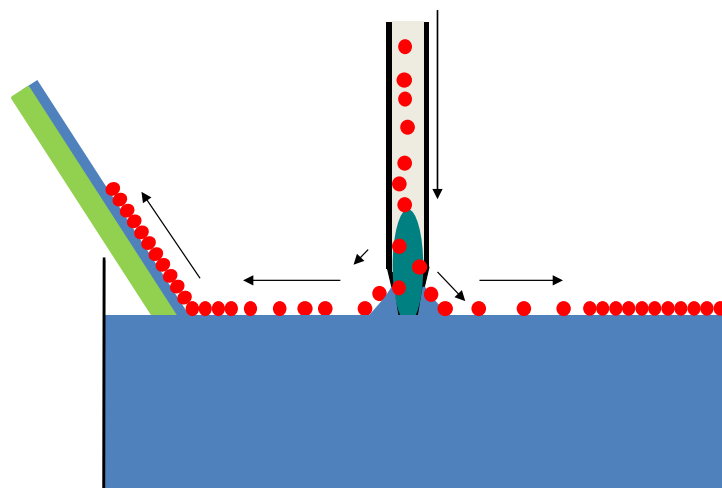

Figure S2. Illustration of the 2-D array preparation on an inclined wet substrate by using a needle tip flow technique. The thin water film on the inclined slide acts as extended water surface for the monolayer CCA film spreading and formation.
